# Supplementary material for: Overexpression of CmMYBS3 decreases the cold tolerance in the ground-cover chrysanthemum
Source: Research Square preprint supplement (doi:10.21203/rs.3.rs-7107028/v1), 2025-08-06
Supplement: Supplementary file 1 [file 6a61acd0d0991781959ac888.docx]

| **Table S1 Primer names and sequences** | | |
| --- | --- | --- |
| **Primer name** | **Farward Sequence(5’-3’)** | **Reverse Sequence(5’-3’)** |
| CmEF1α | CCATTCAAGCGACAGACTCA | TTTTGGTATCTGGTCCTGGAG |
| CmHYG | CTTCTACACAGCCATCGGTCCAG | CGGAAGTGCTTGACATTGGGGAG |
| CmMYBS3 | ATGACTCGACGATGCTCTCA | ATCAAATTGCTCGGAAACCATTACC |
| EVM0006868 | CTAAAGCCTAATGTAAAGAG | GATGAGTATGCCAGTAATT |
| EVM0022717 | AGCCGCAAGTGGGATTAC | ACCTCCTCCTCAGCGAAGC |
| EVM0056947 | TGACGATATGCCACAACT | CGAATCTGGGATGACTAA |
| EVM0018803 | CCTGGAAGGAGCGATAAT | GTTGGTGACGAGGAAATG |
| EVM0020482 | AGTGAAGGGCAGTGAGTA | CTATTAGGACCAAGTTTCG |
| EVM0060714 | CTGCCATCCAACTCTAACA | CAGAAGGTATAGGGTCCTC |
| EVM0059112 | AGCACCTATGATTACTGATG | AACTTGTTTACGGACTGG |
| EVM0066486 | CCCCAGTCTTTCGCTTTC | GGGCAGTGTTCGGTTGTA |
| EVM0020129 | ACAAATGCGGTTGGGTCT | TTCAGTGGCTCGTGGGTG |
| EVM0023763 | ATTAGCCACGGATTTCTC | CGCTTTCGTCCACATTAG |
| EVM0078075 | ATGAAGTCCTCCAGCAAC | TTATACCCTACCAAATCCT |
| EVM0068325 | AGTAGTAGTTACGCTTCG | AACTTTCACTAGGAGGAC |
| EVM0006868 | CTAAAGCCTAATGTAAAGAG | GATGAGTATGCCAGTAATT |

| **Table S2 Physical and chemical characters of CmMYBS3** | | | | |
| --- | --- | --- | --- | --- |
| **Molecular weight** | **Isoelectric point** | **Instability index** | **Grand average hydropathicity** | **Aliphatic index** |
| 38992.64 kDa | 7.72 | 52.27 | -0.66 | 65.39 |

| **Table S3 Comprehensive overview of transcriptomic data** | | | | | |
| --- | --- | --- | --- | --- | --- |
| **Samples** | **Total Reads** | **Clean reads** | **GC Content** | **%≥Q30** | **Mapped Reads** |
| WT-1 | 40,986,294 | 20,493,147 | 43.06% | 97.69% | 26,220,810 (63.97%) |
| WT-2 | 41,828,408 | 20,914,204 | 43.24% | 99.27% | 27,658,621 (66.12%) |
| WT-3 | 41,364,126 | 20,682,063 | 43.29% | 97.96% | 26,724,288 (64.61%) |
| OE3-1 | 39,405,192 | 19,702,596 | 42.11% | 98.22% | 23,990,552 (60.88%) |
| OE3-2 | 38,930,806 | 19,465,403 | 42.10% | 97.38% | 23,425,377 (60.17%) |
| OE3-3 | 41,119,490 | 20,559,745 | 42.02% | 97.67% | 24,768,617 (60.24%) |

| **Table S4 Gene Ontology (GO) classification of DEGs** | | |
| --- | --- | --- |
| **Biological Processes**  **Numbers Of DEGs** | **Cellular Components**  **Numbers Of DEGs** | **Molecular Functions**  **Numbers Of DEGs** |
| 1920 | 2776 | 3468 |


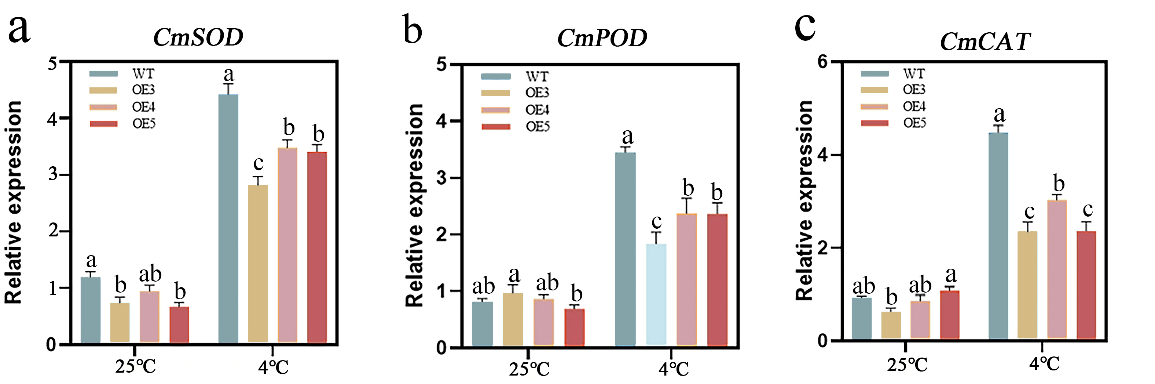


**Fig.S1 Relative expression levels of genes related to ROS homeostasis in wild type and *CmMYBS3* overexpressed lines (OE3, OE4, and OE5) under cold stress condition.**

a-c: Relative expression levels of *CmSOD*, *CmPOD*, and *CmCAT* after 2 hours of treatment at 25 °C and 4 °C. Different lowercase letters in the graphs indicate significant differences (P < 0.05).


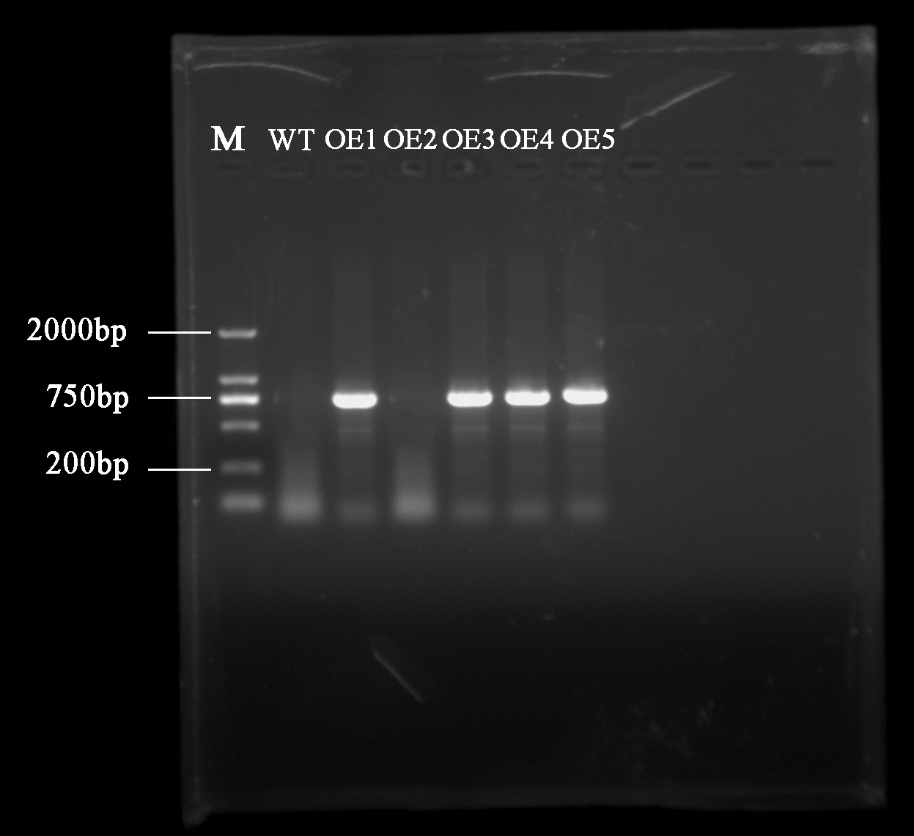


**Fig.4a**
